# Supplementary material for: ISMIP-HOM benchmark experiments using Underworld
Source: Copernicus journal article supplement (doi:10.5194/gmd-15-8749-2022), 2022-12-02
Supplement: Supplementary file 1 [file gmd-15-8749-2022-supplement.zip]

Archive with 4 entries (4 files):
- Results-all-simulations.zip
- gmd-15-8749-2022-supplement-title-page.pdf
- Results_and_Figures.pdf
- Source-all-simulations.zip
