# Supplementary material for: ISMIP-HOM benchmark experiments using Underworld
Source: Copernicus journal article supplement (doi:10.5194/gmd-15-8749-2022), 2022-12-02
Supplement: Supplementary file 1 [file gmd-15-8749-2022-supplement.zip › gmd-15-8749-2022-supplement-title-page.pdf]

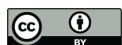

## *Supplement of*

## **ISMIP-HOM benchmark experiments using Underworld**

**Till Sachau et al.**

*Correspondence to:* Paul Bons ([paul.bons@uni-tuebingen.de](mailto:paul.bons@uni-tuebingen.de))

- [gmd-15-8749-2022-supplement-title-page.pdf](#)
- [Results-all-simulations.zip](#)
- [Results\\_and\\_Figures.pdf](#)
- [Source-all-simulations.zip](#)

The copyright of individual parts of the supplement might differ from the article licence.
